# Supplementary material
Source: Springer Nature journal article supplement (https://www.springermedizin.de/resource/supplementary/13063_2011_969_MOESM9_ESM.pdf/9619242)
Supplement: MOESM9 [file 9619242]

Enrollment

Assessed for eligibility N=49

Excluded N=8

- Hospital entry N=1
- Declined to participate N=3
- Does not understand MI N=1
- General health status too bad N=2
- Did not fulfill entry criteria N=2

Randomised N=41

Allocation

**EG 1**  
Allocated to intervention N=13  
Received allocated intervention N=13  
Tested after intervention N=13

**EG 2**  
Allocated to intervention N=13  
Received allocated intervention N=13  
Tested after intervention N=13

**CG**  
Allocated to intervention N=14  
Received allocated intervention N=14  
Tested after intervention N=14

Follow-Up

Lost to follow-up N=0  
Discontinued intervention N=0

Lost to follow-up N=3  
**Reason:**

- No time for FU N=2
- Hospital entry not related to participation N=1

Lost to follow-up N=0  
Discontinued intervention N=0

Analysis

Analysed N=13  
Excluded from analysis N=0

Analysed N=12  
Excluded from analysis N=1  
**Reason:**

- Patient did only receive 2 of 6 intervention sessions

Analysed N=14  
Excluded from analysis N=0
